# Supplementary material for: Texture-structure-based liquid metal filling for blind-end microchannels and its application on multi-layer chips
Source: Royal Society of Chemistry journal article supplement (doi:10.1039/d3ra04497a), 2023-01-01
Supplement: d3ra04497a1.pdf [file d3ra04497a1.pdf]

## Texture-structure-based liquid metal filling for blind-end microchannels and its application on multi-layer chips

Yuqing Li,<sup>ab</sup> Huimin Zhang,<sup>ac</sup> Qian Li,<sup>ac</sup> Yuqin Deng,<sup>ab</sup> Zi Ye<sup>a</sup> and Lin Gui<sup>\*ab</sup>

- a. Key Laboratory of Cryogenics, Technical Institute of Physics and Chemistry, Chinese Academy of Sciences, 29 Zhongguancun East Road, Haidian District, Beijing, 100190, China. E-mail: lingui@mail.ipc.ac.cn
- b. School of Future Technology, University of Chinese Academy of Sciences, Beijing, 10039, China.
- c. School of Engineering Science, University of Chinese Academy of Sciences, Beijing, 10039, China.

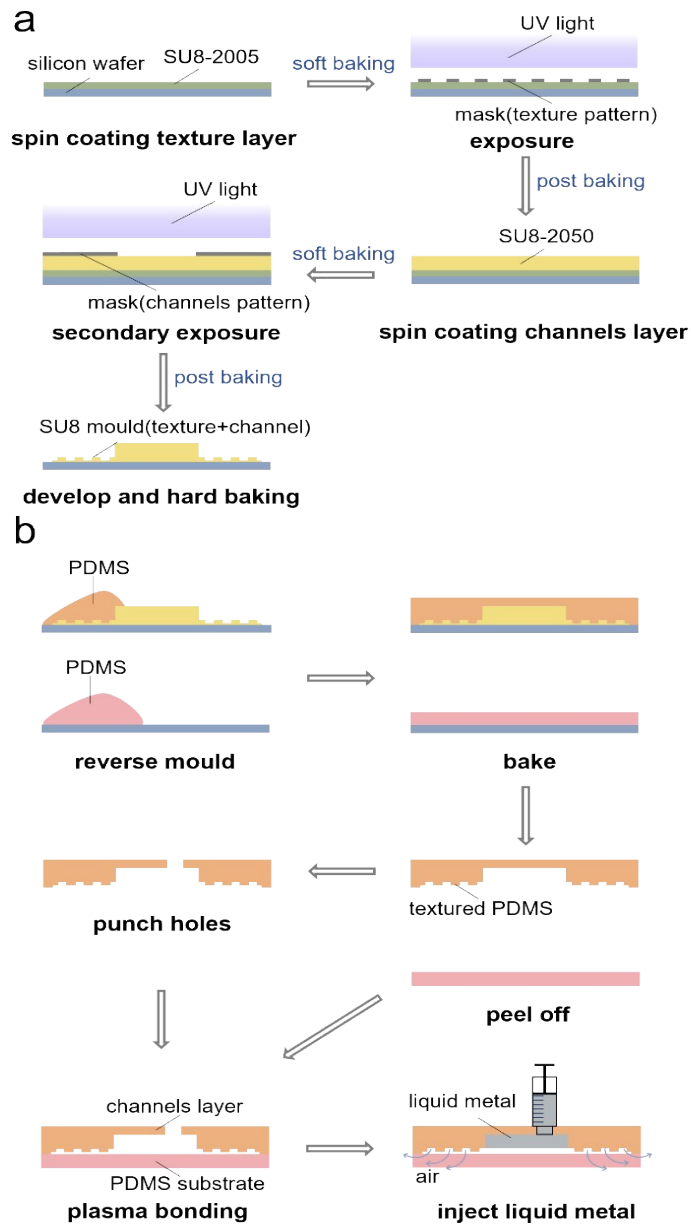

Fig. S1 Chip fabrication process using multi-lithography technology for blind-end injection. a) Multi-lithography technology process. b) Chip fabrication process.

Fig.S1 shows the fabrication process of double-layer lithography. Firstly, a texture layer is fabricated using SU8-2005 and then a blind-end microchannel layer is fabricated on the upper layer using SU8-2050. The microfluidic chip fabricated by this method also realizes the fast injection of complex blind-end microstructures.

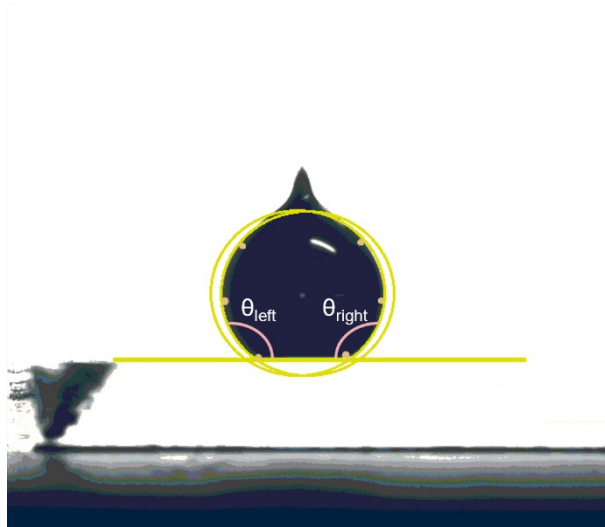

Fig. S2 Contact angle of liquid metal on PDMS with texture structure

Fig.S2 shows an image of liquid metal (EGaIn) on a PDMS substrate with a texture structure in a room-temperature air environment taken with a contact angle meter (POWEEACH JC2000D1, China) and the contact angle of a liquid droplet on the substrate is measured to be  $145^\circ$  using the "eight-point method".
